# Supplementary material for: Correction and Accuracy of PurpleAir PM2.5 Measurements for Extreme Wildfire Smoke
Source: MDPI journal article supplement (doi:10.3390/s22249669), 2022-12-10
Supplement: s1 [file s1]

# Supplemental Information

## Correction and Accuracy of PurpleAir PM<sub>2.5</sub> Measurements for Extreme Wildfire Smoke

Karoline K. Barkjohn<sup>1,\*</sup>, Amara L. Holder<sup>1</sup>, Samuel G. Frederick<sup>2,3</sup> and Andrea L. Clements<sup>1</sup>

<sup>1</sup> US Environmental Protection Agency Office of Research and Development,  
Research Triangle Park, Durham, NC 27711, USA

<sup>2</sup> Former ORAU Student Services Contractor, US Environmental Protection Agency Office of Research and  
Development, Research Triangle Park, Durham NC 27711, USA

<sup>3</sup> Currently Department of Atmospheric Sciences, University of Illinois Urbana-Champaign,  
Urbana, IL 61801, USA

\* Correspondence: barkjohn.karoline@epa.gov

### 1 Removing clear outliers from the reference monitors

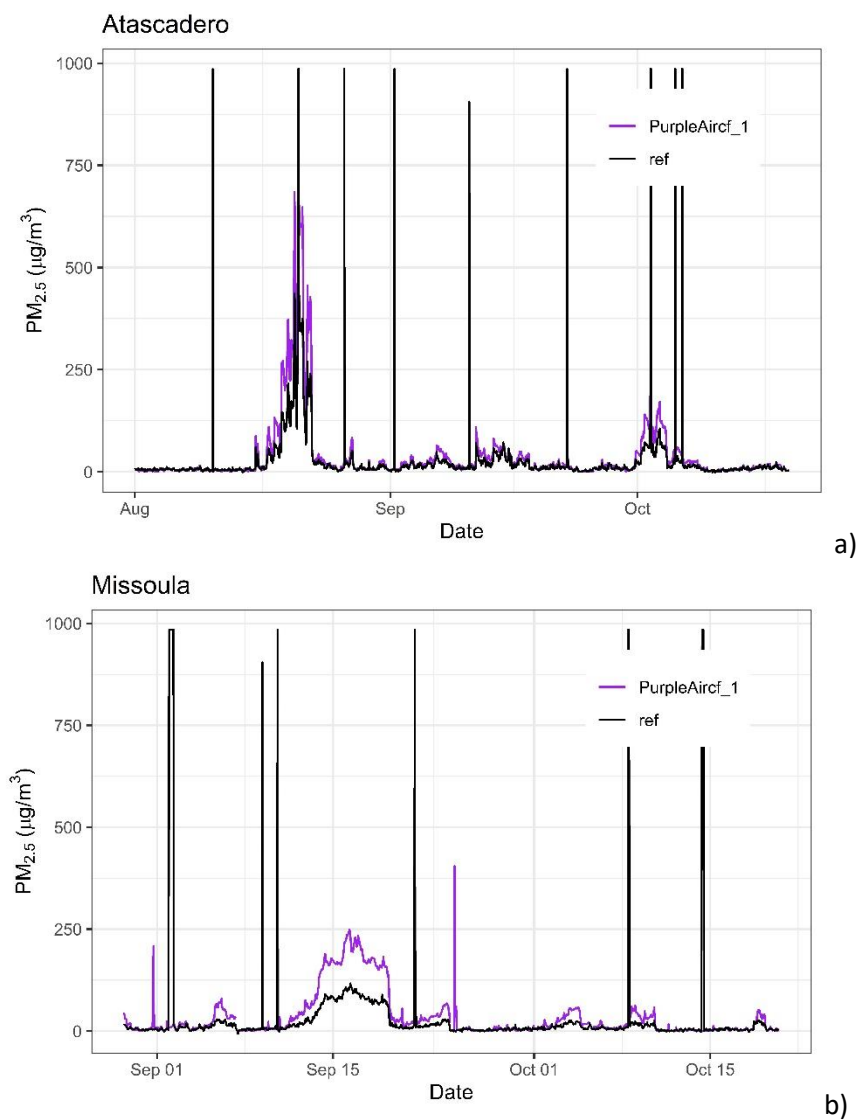

Figure S 1. Clear outliers were seen in the Atascadero (a) and Missoula (b) datasets and reference points above 750 µg/m<sup>3</sup> were removed. Many of these are instrument error codes.

## 2 Additional details on sensor monitor pairs evaluated

Table S 1. Reference monitor IDs, PurpleAir names, and locations for true collocations.

| Type              | City             | Source      | ID                  | PA name                                | Latitude  | Longitude |
|-------------------|------------------|-------------|---------------------|----------------------------------------|-----------|-----------|
| Smoke             | Happy Camp, CA   | Offline     | Research instrument | Offline                                | 41.8      | -123.4    |
|                   | Missoula, MT     | AQS         | 30-063-0024         | Offline                                | 46.84218  | -114.021  |
|                   | Oakley, UT       | Offline     | Research instrument | Offline                                | 40.7      | -111.3    |
|                   | Pinehurst, CA    | Offline     | Research instrument | Offline                                | 36.7      | -119.0    |
|                   | RTP, NC          | AirNow Tech | 37-063-0099         | Offline                                | 35.889391 | -78.8742  |
| Smoke and Ambient | Atascadero, CA   | AQS         | 6-79-8002           | Atascadero                             | 35.49453  | -120.666  |
| Ambient           | Appleton, WI     | AQS         | 55-087-0009         | Appleton                               | 44.30738  | -88.3951  |
|                   | Cedar Rapids, IA | AQS         | 19-113-0040         | Private (Linn2)                        | 41.97677  | -91.6877  |
|                   | Decatur, GA      | AQS         | 13-089-0002         | Private (LTPP_GA)                      | 33.6878   | -84.2905  |
|                   | Denver, CO       | AQS         | 8-031-0026          | Private (LTPP_CO)                      | 39.77949  | -105.005  |
|                   | Edmond, OK       | AQS         | 40-109-1037         | Private (LTPP_OK)                      | 35.61413  | -97.4751  |
|                   | Marysville, WA   | AQS         | 53-061-1007         | Marysville 7th                         | 48.05432  | -122.172  |
|                   | Missoula, MT     | AQS         | 30-063-0024         | EPA 92B4                               | 46.84218  | -114.021  |
|                   | Phoenix, AZ      | AQS         | 04-013-0019         | Private (LTPP_AZ)                      | 33.48385  | -112.143  |
|                   | RTP, NC*         | AirNow Tech | 37-063-0099         | Private (LTPP_NC01)                    | 35.889391 | -78.8742  |
|                   | Sarasota, FL     | AQS         | 12-115-0013         | SCG Air & Water Quality_EPA Air Sensor | 27.29056  | -82.5072  |
|                   | Topeka, KS       | AQS         | 20-177-0013         | KNI_E2                                 | 39.02427  | -95.7113  |
|                   | Wilmington, DE   | AQS         | 10-003-2004         | Private (LTPP_DE)                      | 39.73944  | -75.5581  |

Table S 2. Reference monitor types, IDs, and locations for nearby sensor monitor pairs identified on the Fire and Smoke map.

|                        | Monitor |                                                             |                                                                                        |          |           | PurpleAir                                     |           |            |              |
|------------------------|---------|-------------------------------------------------------------|----------------------------------------------------------------------------------------|----------|-----------|-----------------------------------------------|-----------|------------|--------------|
| City                   | Source  | ID                                                          | Monitor type                                                                           | Latitude | Longitude | Name                                          | Latitude  | Longitude  | distance (m) |
| Bend, OR               | AirNow  | 41-017-0120                                                 | Radiance Research<br>M903 With Heated Inlet<br>- Nephelometry                          | 44.06392 | -121.313  | BPS                                           | 44.06394  | -121.313   | 2            |
| Boise, ID              | AirNow  | 16-001-0010                                                 | Met-One BAM-1020<br>W/PM2.5 SCC - Beta<br>Attenuation                                  | 43.6007  | -116.348  | K Bar T                                       | 43.58592  | -116.317   | 2994         |
| El Portal              | Airsis  | lon_.119.784_lat_37<br>.675_apcd.1011                       | E-BAM                                                                                  | 37.675   | -119.784  | CARB_SMOKE_MC<br>APCD_Old_Elportal            | 37.67584  | -119.77941 | 416          |
| Forks of<br>Salmon, CA | Airsis  | lon_.123.331_lat_41<br>.260_arb2.1035<br>ARB 1035 (Salmon)  | E-BAM                                                                                  | 41.260   | 123.331   | Forks of Salmon                               | 37.64591  | -118.967   | 7            |
| Hoopa, CA              | Airsis  | lon_.123.675_lat_41<br>.047_arb2.1025<br>ARB 1025 (Hoopa 2) | E-BAM                                                                                  | 41.047   | 123.675   | Hoopa HS                                      | 41.047067 | -123.675   | 7            |
| Keeler, CA             | AirNow  | 6-027-1003                                                  | Thermo Scientific TEOM<br>1400 FDMS or 1405<br>8500C FDMS w/VSCC -<br>FDMS Gravimetric | 36.48782 | -117.871  | CARB_S_GBUAPCD<br>_Keeler                     | 36.48757  | -117.871   | 28           |
| Oakridge,<br>OR        | AirNow  | 41-039-2013                                                 | Met One BAM-1022<br>Mass Monitor w/ VSCC<br>or TE-PM2.5C - Beta<br>Attenuation         | 43.74435 | -122.48   | LRAPA-Oakridge 2                              | 43.74431  | -122.481   | 81           |
| Oroville, CA           | Airsis  | lon_.121.546_lat_39<br>.510_apcd.1029<br>BUTTE EBAM         | E-BAM                                                                                  | 39.510   | -121.546  | CARB_SMOKE_BCA<br>QMD_OROVILLE                | 39.51039  | -121.547   | 96           |
| Tulelake, CA           | Airsis  | on_.121.479_lat_41.<br>956_arb2.1010                        | E-BAM                                                                                  | 41.956   | -121.479  | CARB_SMOKE_SCA<br>PCD_TULELAKE_EL<br>EMENTARY | 41.95588  | -121.480   | 84           |

### 3 Comparability of FRMs and FEMs

**Table S3.** Available FEM comparability assessments (13/17 FEM sites) (<https://www.epa.gov/outdoor-air-quality-data/pm25-continuous-monitor-comparability-assessments>, last access January 21, 2022). Assessments look at all data available for comparison from the past 3 years at 24-hr averages. The approximate maximum FRM PM<sub>2.5</sub> concentration was read off the generated scatter plots. Shaded cells did not meet the targets for regulatory monitors (slope=0.9 to 1.1, Intercept=-2 to 2).

| City         | State      | County    | AQS         | monitor                                                                       | Y=cont., x=FRM |       |      | Cont/<br>FRM | FRM PM <sub>2.5</sub> (µg/m <sup>3</sup> ) |             | Most Recent Year |
|--------------|------------|-----------|-------------|-------------------------------------------------------------------------------|----------------|-------|------|--------------|--------------------------------------------|-------------|------------------|
|              |            |           |             |                                                                               | slope          | int   | R    | ratio        | Mean                                       | Approx. Max |                  |
| Appleton     | Wisconsin  |           | 55-087-0009 | BAM-1020                                                                      | 0.95           | -0.26 | 0.95 | 0.91         | 6.5                                        | 27          | 2017             |
| Bend         | Oregon     | Deschutes | 41-017-0120 | Radiance Research M903 With Heated Inlet - Nephelometry                       | 0.87           | 0.44  | 0.97 | 0.95         | 5.1                                        | 39          | 2010             |
| Bishop       | California | Inyo      | 6-027-0002  | Teledyne T640X at 16.67 LPM - Broadband spectroscopy                          | 1.65           | -2.10 | 0.99 | 1.34         | 6.8                                        | 120         | 2021             |
| Boise        | Idaho      | Ada       | 16-001-0010 | Met-One BAM-1020 W/PM2.5 SCC - Beta Attenuation                               | 0.99           | 1.26  | 0.97 | 1.16         | 7.5                                        | 85          | 2021             |
| Cedar Rapids | Iowa       | Linn      | 19-113-0040 | Met One BAM-1020 Mass Monitor w/VSCC - Beta Attenuation                       | 0.88           | 0.16  | 0.94 | 0.96         | 8.2                                        | 32          | 2020             |
| Cedar Rapids | Iowa       | Linn      | 19-113-0040 | Teledyne T640 at 5.0 LPM - Broadband spectroscopy                             | 0.96           | 1.63  | 1.63 | 1.16         | 8.2                                        | 32          | 2022             |
| Decatur      | Georgia    | DeKalb    | 13-089-0002 | Teledyne T640X at 16.67 LPM - Broadband spectroscopy                          | 1.00           | 1.07  | 0.95 | 1.13         | 8.1                                        | 37          | 2021             |
| Denver       | Colorado   | Denver    | 8-031-0026  | Teledyne T640 at 5.0 LPM - Broadband spectroscopy                             | 1.20           | 0.08  | 0.96 | 1.21         | 7.4                                        | 43          | 2021             |
| Edmond       | Oklahoma   | Oklahoma  | 40-109-1037 | Teledyne T640 at 5.0 LPM - Broadband spectroscopy,                            | 0.98           | 2.35  | 0.89 | 1.30         | 7.3                                        | 33          | 2019             |
| Edmond       | Oklahoma   | Oklahoma  | 40-109-1037 | Teledyne T640X at 16.67 LPM - Broadband spectroscopy                          | 1.26           | 1.78  | 0.88 | 1.52         | 6.8                                        | 24          | 2022             |
| Keeler       | California | Inyo      | 6-027-1003  | Thermo Scientific TEOM 1400 FDMS or 1405 8500C FDMS w/VSCC - FDMS Gravimetric | 1.28           | 0.39  | 1.00 | 1.34         | 6.7                                        | 115         | 2021             |
| Mammoth      | California | Mono      | 6-051-0001  | Teledyne T640X at 16.67 LPM - Broadband spectroscopy                          | 1.95           | -4.10 | 0.99 | 1.65         | 13.7                                       | 310         | 2021             |
| Oakridge     | Oregon     | Lane      | 41-039-2013 | Met One BAM-1022 Mass Monitor w/ VSCC or TE-PM2.5C - Beta Attenuation         | 0.95           | 0.05  | 1.00 | 0.96         | 15.6                                       | 580         | 2020             |

|            |          |            |             |                                                                    |      |      |      |      |     |    |      |
|------------|----------|------------|-------------|--------------------------------------------------------------------|------|------|------|------|-----|----|------|
| Phoenix    | Arizona  | Maricopa   | 04-013-0019 | Thermo Scientific TEOM 1405-DF Dichotomous FDMS - FDMS Gravimetric | 1.02 | 0.07 | 0.98 | 1.02 | 8.6 | 32 | 2021 |
| Sarasota   | Florida  | Sarasota   | 12-115-0013 | Teledyne T640 at 5.0 LPM - Broadband spectroscopy                  | 0.82 | 1.49 | 0.96 | 1.05 | 6.5 | 19 | 2018 |
| Wilmington | Delaware | New Castle | 10-003-2004 | Teledyne T640 at 5.0 LPM - Broadband spectroscopy                  | 0.97 | 1.19 | 0.96 | 1.13 | 7.6 | 32 | 2020 |

Table S 4. Unavailable FEM comparisons (<https://www.epa.gov/outdoor-air-quality-data/pm25-continuous-monitor-comparability-assessments>, last access January 21, 2022).

| City       | State          | County          | AQS         | Monitor                                                                                                            | Notes                                   |
|------------|----------------|-----------------|-------------|--------------------------------------------------------------------------------------------------------------------|-----------------------------------------|
| Appleton   | Wisconsin      |                 | 55-087-0009 | Teledyne T640 at 5.0 LPM - Broadband spectroscopy                                                                  | No report for this monitor              |
| Atascadero | California     | San Luis Obispo | 6-79-8002   | Met One BAM-1020 Mass Monitor w/VSCC - Beta Attenuation                                                            | Site not listed                         |
| Topeka     | Kansas         | Shawnee         | 20-177-0013 | Teledyne T640 at 5.0 LPM - Broadband spectroscopy                                                                  | No reports                              |
| Marysville | Washington     | Snohomish       | 53-061-1007 | Thermo Scientific 1405-F FDMS w/VSCC - FDMS Gravimetric<br>Met One BAM-1020 Mass Monitor w/VSCC - Beta Attenuation | No report for either monitor            |
| Missoula   | Montana        | Missoula        | 30-063-0024 | Met One BAM-1020 Mass Monitor w/VSCC - Beta Attenuation                                                            | County not listed                       |
| RTP        | North Carolina | Durham          | 37-063-0099 | Teledyne T640X at 16.67 LPM - Broadband spectroscopy                                                               | Site not listed (not a regulatory site) |

To better understand over which concentration range the T640s provide accurate data, 3 years of 24-hr averaged data were downloaded from AQS (2019-2021, download: January 2022). The T640 or T640x data were matched with FRM measurements and segmented regression (Muggeo 2008) was used to understand the change in bias over the full range of concentrations (24-hr average range 0-309  $\mu\text{g}/\text{m}^3$ ). In the segmented regression, the number of breakpoints was increased from 0-3 (Table S 3). The regression was run separately for T640 and T640x. We would expect the T640 and T640x to perform comparably, as to our knowledge the primary difference is the inlet utilized to meet FEM  $\text{PM}_{10}$  designation requirements. Using 2 breakpoints the T640 has a reasonable relationship with the FRM with a slope of 0.95 from 0-10  $\mu\text{g}/\text{m}^3$ , and a slope of 1.13 from 10-30 with intercepts within 2  $\mu\text{g}/\text{m}^3$ . However, above 30  $\mu\text{g}/\text{m}^3$  the accuracy is poor with a slope of 0.53 with an intercept of 18  $\mu\text{g}/\text{m}^3$ . Results were similar for the T640x with a breakpoint near the limit of detection (0.52  $\mu\text{g}/\text{m}^3$ ) and good performance between the limit of detection and 35  $\mu\text{g}/\text{m}^3$  with a slope of 1.07. However, the accuracy is poor above 36  $\mu\text{g}/\text{m}^3$  with a slope of 1.99 with an intercept of -32  $\mu\text{g}/\text{m}^3$ . The poor accuracy could be driven by extreme values experienced by the T640x but only looking at the piecewise regression from 0-80  $\mu\text{g}/\text{m}^3$  results in a similar breakpoint and worse slope and intercept above the top breakpoint. Due to the nonlinear performance of the T640 and T640x especially above 30-38  $\mu\text{g}/\text{m}^3$  we have excluded all high concentration (>35  $\mu\text{g}/\text{m}^3$ ) T640 data from this analysis. We have used 35  $\mu\text{g}/\text{m}^3$  for simplicity since it is the break between the moderate and the unhealthy for sensitive groups categories. This removes only 0.8% of the total dataset (removed: Decatur N=5, Denver N=230, Edmond N=69, Sarasota N=19, Topeka N=86, Wilmington N=27). No T640 or T640x nearby smoke-impacted monitors were used moving forward (Table S 4).

# PM<sub>2.5</sub> Continuous Monitor Comparability Assessment

Site 06-051-0001: Mammoth Lakes, CA

FRM: R & P Model 2025 PM<sub>2.5</sub> Sequential Air Sampler w/VSCC - Gravimetric (145), PM<sub>2.5</sub> - Local Conditions (88101), POC=5  
Cont: Teledyne T640X at 16.67 LPM - Broadband spectroscopy (238), PM<sub>2.5</sub> - Local Conditions (88101), POC=6

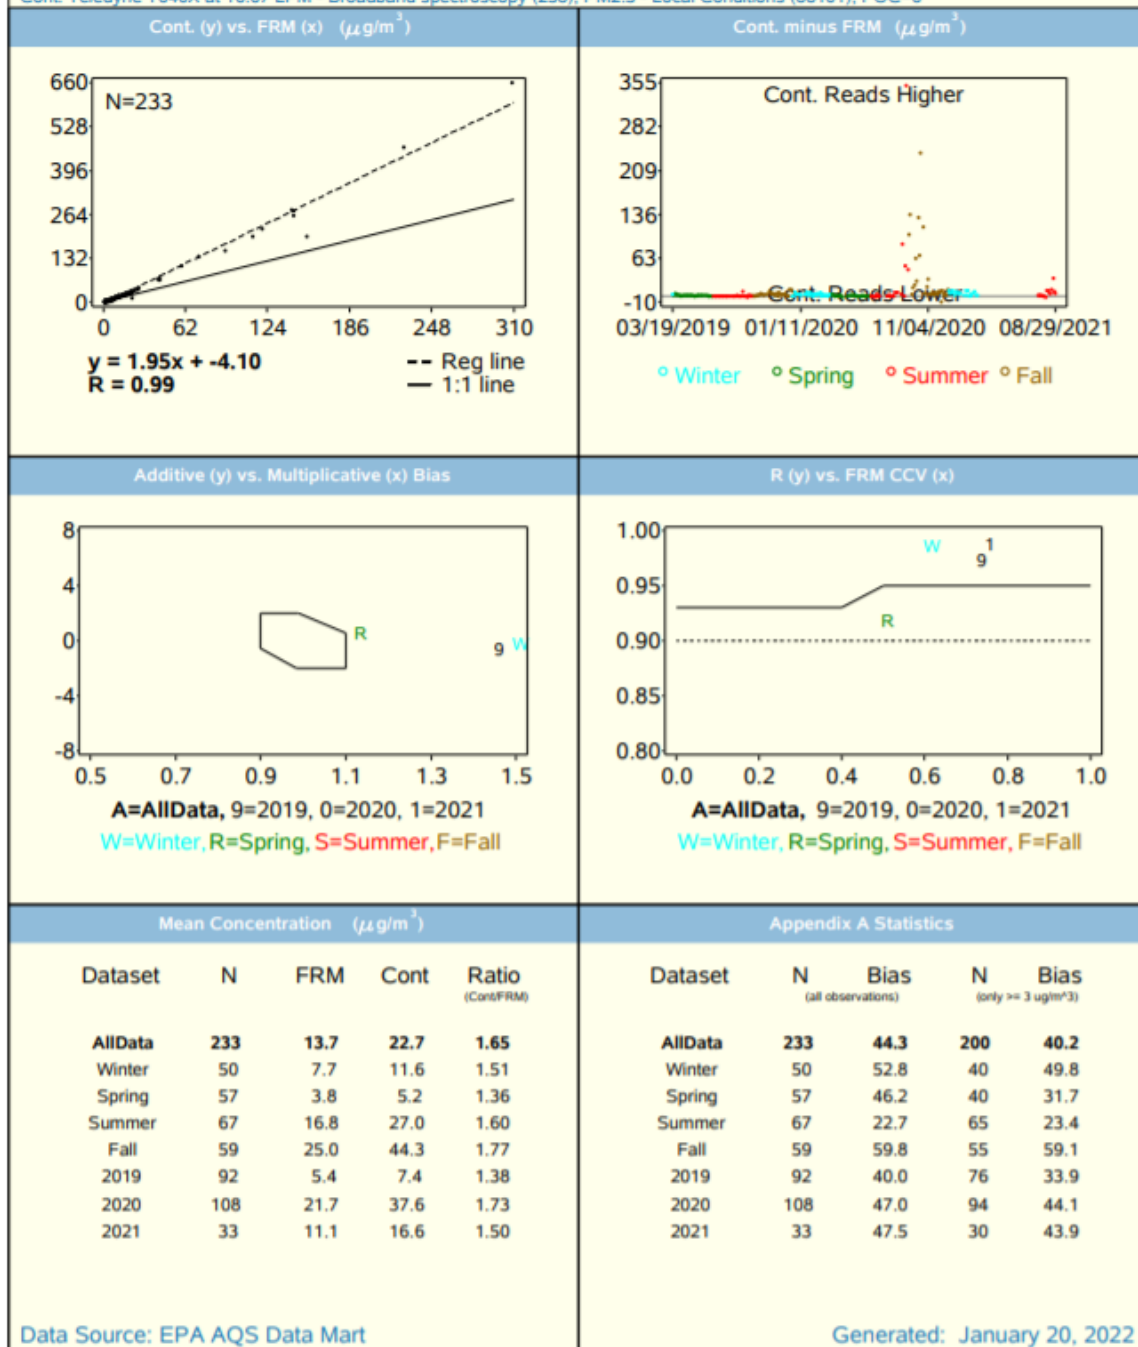

Figure S 2. 24-hr averaged performance of T640x versus gravimetric measurements (<https://www.epa.gov/outdoor-air-quality-data/pm25-continuous-monitor-comparability-assessments>, last accessed January 20, 2022). Some points are outside the ranges on the plots.

Table S 5. We considered all 24-hr averaged data from T640s and T640x monitors compared to FRM for the past 3 years. (Data downloaded from [https://aqs.epa.gov/aqsweb/airdata/download\\_files.html](https://aqs.epa.gov/aqsweb/airdata/download_files.html), access 1/21/2022). This analysis included 86 T640 sites and 62 T640x sites. We fit a segmented regression (using R package segmented –(Muggeo 2008)).

| T640 (N=23,447, FRM range: 0-77 µg/m³) |                   |             |             |       |      |             | T640x (N=13,009, FRM range: 0-309 µg/m³) |             |             |        |      |             | T640x<80 (N= 12,997, FRM range: 0-72 µg/m³) |             |             |        |      |             |
|----------------------------------------|-------------------|-------------|-------------|-------|------|-------------|------------------------------------------|-------------|-------------|--------|------|-------------|---------------------------------------------|-------------|-------------|--------|------|-------------|
| #                                      |                   |             |             |       |      |             |                                          |             |             |        |      |             |                                             |             |             |        |      |             |
| Break points (BP)                      | R² <sub>adj</sub> | RSE (µg/m³) | Slope or BP | Est   | SE   | Int (µg/m³) | R² <sub>adj</sub>                        | RSE (µg/m³) | Slope or BP | Est    | SE   | Int (µg/m³) | R² <sub>adj</sub>                           | RSE (µg/m³) | Slope or BP | Est    | SE   | Int (µg/m³) |
| 0                                      | 0.87              | 1.90        | S1          | 1.03  | 0.00 | 1.18        | 0.89                                     | 3.72        | S1          | 1.52   | 0.00 | -2.27       | 0.85                                        | 2.23        | S1          | 1.11   | 0.00 | 0.70        |
| 1                                      | 0.87              | 1.89        | BP1         | 7.57  | 0.35 |             | 0.95                                     | 2.57        | BP1         | 35.01  | 0.58 |             | 0.86                                        | 2.13        | BP1         | 37.61  | 0.63 |             |
|                                        |                   |             | S1          | 0.94  | 0.01 | 1.63        |                                          |             | S1          | 1.07   | 0.01 | 0.99        |                                             |             | S1          | 1.07   | 0.00 | 1.01        |
|                                        |                   |             | S2          | 1.06  | 0.00 | 0.76        |                                          |             | S2          | 1.99   | 0.01 | -31.25      |                                             |             | S2          | 2.31   | 0.05 | -45.74      |
| 2                                      | 0.87              | 1.86        | BP1         | 9.89  | 0.25 |             | 0.95                                     | 2.56        | BP1         | 0.52   | 0.06 |             | 0.86                                        | 2.12        | BP1         | 0.52   | 0.05 |             |
|                                        |                   |             | BP2         | 29.94 | 0.43 |             |                                          |             | BP2         | 35.62  | 0.61 |             |                                             |             | BP2         | 37.61  | 0.56 |             |
|                                        |                   |             | S1          | 0.95  | 0.01 | 1.59        |                                          |             | S1          | -19.25 | 4.17 | 11.50       |                                             |             | S1          | -19.23 | 3.45 | 11.50       |
|                                        |                   |             | S2          | 1.13  | 0.01 | -0.22       |                                          |             | S2          | 1.07   | 0.01 | 0.96        |                                             |             | S2          | 1.07   | 0.00 | 0.99        |
|                                        |                   |             | S3          | 0.53  | 0.02 | 17.83       |                                          |             | S3          | 1.99   | 0.01 | -31.83      |                                             |             | S3          | 2.31   | 0.05 | -45.56      |
| 3                                      | 0.86              | 1.85        | BP1         | 0.80  | 0.08 |             | 0.95                                     | 2.56        | BP1         | 0.55   | 0.07 |             | 0.86                                        | 2.12        | BP1         | 3.49   | 1.38 |             |
|                                        |                   |             | BP2         | 10.08 | 0.27 |             |                                          |             | BP2         | 9.95   | 0.68 |             |                                             |             | BP2         | 8.86   | 0.56 |             |
|                                        |                   |             | BP3         | 30.66 | 0.46 |             |                                          |             | BP3         | 37.13  | 0.75 |             |                                             |             | BP3         | 38.05  | 0.72 |             |
|                                        |                   |             | S1          | -6.60 | 1.34 | 7.55        |                                          |             | S1          | -16.44 | 4.16 | 10.93       |                                             |             | S1          | 1.05   | 0.06 | 1.22        |
|                                        |                   |             | S2          | 0.96  | 0.01 | 1.54        |                                          |             | S2          | 1.01   | 0.01 | 1.31        |                                             |             | S2          | 0.99   | 0.02 | 1.45        |
|                                        |                   |             | S3          | 1.13  | 0.01 | -0.20       |                                          |             | S3          | 1.14   | 0.01 | 0.01        |                                             |             | S3          | 1.12   | 0.01 | 0.27        |
|                                        |                   |             | S4          | 0.51  | 0.02 | 18.90       |                                          |             | S4          | 1.99   | 0.01 | -31.62      |                                             |             | S4          | 2.27   | 0.05 | -43.58      |



Table S 6. Reference monitor types and IDs for nearby sensor T640/T640x pairs identified on the Fire and Smoke map. These were not used in the analysis due to the high bias at high concentration.

| City              | Source | ID         | Monitor type                                         | Latitude | Longitude | Name            | Latitude  | Longitude | distance (m) |
|-------------------|--------|------------|------------------------------------------------------|----------|-----------|-----------------|-----------|-----------|--------------|
| Bishop, CA        | AirNow | 6-027-0002 | Teledyne T640X at 16.67 LPM - Broadband spectroscopy | 37.36068 | -118.331  | GBUAPCD_NCORE 2 | 37.360497 | -118.332  | 91           |
| Mammoth Lakes, CA | AirNow | 6-051-0001 | Teledyne T640X at 16.67 LPM - Broadband spectroscopy | 37.64571 | -118.967  | MammothLakes    | 37.6254   | -118.981  | 2571         |

## 4 NowCast

AirNow's Air Quality Index (AQI) gives a daily measure of air quality conditions and associated health risk. While the AQI provides individuals with a 24-hr average measure of air quality, EPA has devised the NowCast as a means for reporting changes in air quality on higher time-resolution levels. The NowCast results in hourly PM concentration values computed via a 12-hour window of hourly PM average values. Hourly PM values are weighted based on how rapidly the concentration levels change within the 12-hour window; a high rate of change results in higher weighting of concentration values recorded for the most recent hours.

### NowCast Calculation

The NowCast for a selected (current) hour is computed via the following steps:

1. Select a 12-hour window of PM measurements whereby the oldest hour in the selection is 11 hours preceding the current hour and the most recent (current) hour is the hour for which the NowCast is computed. At least two of the last three hours (including the current hour) must have concentration values to compute the NowCast.
2. From this 12-hour window, select the maximum and minimum PM concentrations present. Compute the range by subtracting the minimum from the maximum.
3. Normalize the range by dividing by the maximum concentration value. This gives a measure of the rate of change of PM values within the 12-hour window.
4. Compute the weight factor by subtracting the normalized rate of change from 1.
5. If the weight factor is less than 0.5, round the value up to 0.5. The weight factor must fall within the range 0.5 to 1.0.
6. Multiply each hour in the 12-hour window by the weight factor raised to the power of the number of hours ago that the value was recorded. The most recent (current) hour in the series is raised to the zeroth power and the oldest hour is raised to the 11th power.
7. Sum the weighted PM values computed in the previous step for each hour in the 12-hour window.
8. In a similar method to steps 6 and 7, compute the sum of the weight factor raised to the 0th through 11th power. This sum includes 12 terms, whereby the power of each term corresponds to the number of hours ago that a concentration value was recorded.
9. Divide the weighted concentration sum calculated in step 7 by the sum determined in step 8. The result is the NowCast for the zeroth (current) hour in the 12-hour window.

Table S 7. Air Quality Index (AQI) breakpoints used to convert PM<sub>2.5</sub> NowCast concentration into AQI (EPA 2021).

| AQI Category                          | Low |     | High                               |                                    |
|---------------------------------------|-----|-----|------------------------------------|------------------------------------|
|                                       | AQI | AQI | Breakpoint<br>(µg/m <sup>3</sup> ) | Breakpoint<br>(µg/m <sup>3</sup> ) |
| Good                                  | 0   | 50  | 0                                  | 12                                 |
| Moderate                              | 51  | 100 | 12.1                               | 35.4                               |
| Unhealthy for sensitive groups (UHSG) | 101 | 150 | 35.5                               | 55.4                               |
| Unhealthy                             | 151 | 200 | 55.5                               | 150.4                              |
| Very unhealthy (VUH)                  | 201 | 300 | 150.5                              | 250.4                              |
| Hazardous                             | 301 | 400 | 250.5                              | 350.4                              |
| Hazardous                             | 401 | 500 | 350.5                              | 500.4                              |
| Hazardous                             | 501 | 999 | 500.5                              | 99999.9                            |

## 5 Additional figures and tables

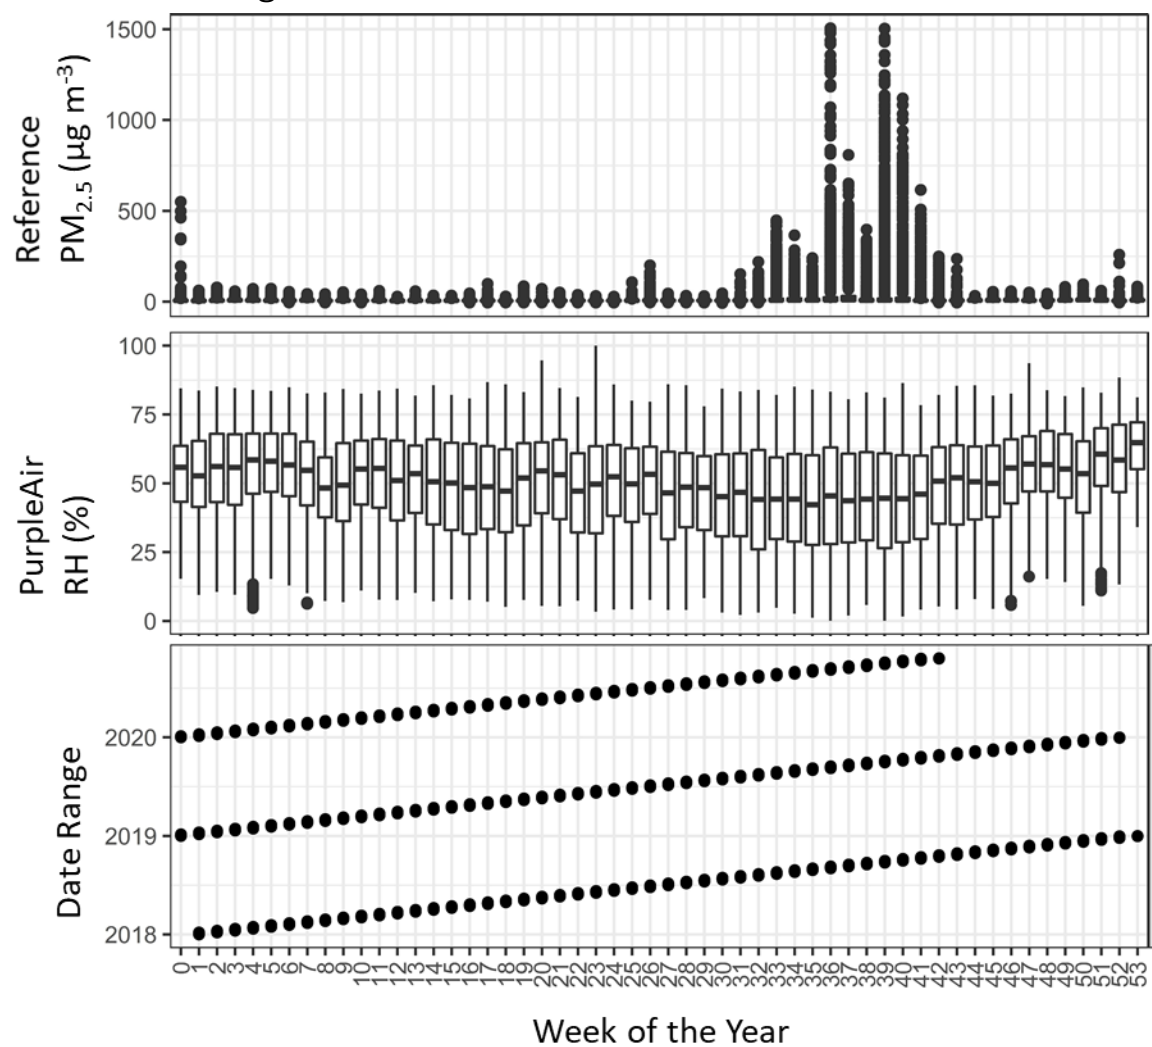

Figure S 3. Summary of distribution of RH and  $\text{PM}_{2.5}$  by week of the year (withholding groups).

Table S 8. Comparison of error by correction equation A-D (from **Table 3**) binned by concentration range surrounding each air quality index breakpoint, the Cal/OSHA limit to put on a respirator (500 µg/m<sup>3</sup>), low concentration data (0-10 µg/m<sup>3</sup>), and extremely high concentrations (>600 µg/m<sup>3</sup>). Error is summarized by normalized mean bias error (NMBE), normalized mean absolute error (NMAE), and normalized root mean squared error (NRMSE). Grey shaded rows have an absolute NMBE greater than 10%.

| Model          | AQI breakpoint | Range<br>PM <sub>2.5</sub><br>(µg/m <sup>3</sup> ) | N     | Leave one site out |       |      |      | Leave one week out                        |       |      |      |
|----------------|----------------|----------------------------------------------------|-------|--------------------|-------|------|------|-------------------------------------------|-------|------|------|
|                |                |                                                    |       | NMBE               | NRMSE | RMSE | NMAE | NMBE                                      | NRMSE | RMSE | NMAE |
| A-U.S.-wide    | Below (Good)   | 0-10                                               | 90960 | -5%                | 54%   | 3    | 40%  | No withholding since preexisting equation |       |      |      |
|                | Good→Moderate  | 10-14                                              | 15205 | -10%               | 31%   | 4    | 23%  |                                           |       |      |      |
|                | Moderate→UHSG  | 28-42                                              | 2196  | 4%                 | 27%   | 9    | 20%  |                                           |       |      |      |
|                | UHSG→Unhealthy | 44-66                                              | 1291  | 9%                 | 22%   | 12   | 17%  |                                           |       |      |      |
|                | Unhealthy→VUH  | 120-180                                            | 503   | 2%                 | 12%   | 18   | 10%  |                                           |       |      |      |
|                | VUH→Hazardous  | 200-300                                            | 475   | -6%                | 12%   | 29   | 9%   |                                           |       |      |      |
|                | Cal/OSHA       | 400-600                                            | 230   | -24%               | 25%   | 123  | 24%  |                                           |       |      |      |
|                | Beyond         | 600+                                               | 189   | -41%               | 45%   | 392  | 41%  |                                           |       |      |      |
| B-Quadratic    | Below (Good)   | 0-10                                               | 90960 | 16%                | 51%   | 3    | 35%  | 15%                                       | 50%   | 3    | 34%  |
|                | Good→Moderate  | 10-14                                              | 15205 | -10%               | 27%   | 3    | 21%  | -11%                                      | 27%   | 3    | 21%  |
|                | Moderate→UHSG  | 28-42                                              | 2196  | -12%               | 26%   | 9    | 20%  | -12%                                      | 25%   | 9    | 19%  |
|                | UHSG→Unhealthy | 44-66                                              | 1291  | -7%                | 20%   | 11   | 15%  | -7%                                       | 19%   | 11   | 15%  |
|                | Unhealthy→VUH  | 120-180                                            | 503   | 1%                 | 15%   | 22   | 12%  | 0%                                        | 15%   | 22   | 11%  |
|                | VUH→Hazardous  | 200-300                                            | 475   | 5%                 | 17%   | 42   | 14%  | 6%                                        | 16%   | 41   | 13%  |
|                | Cal/OSHA       | 400-600                                            | 230   | 0%                 | 16%   | 76   | 12%  | 1%                                        | 18%   | 85   | 13%  |
|                | Beyond         | 600+                                               | 189   | -8%                | 23%   | 201  | 18%  | -7%                                       | 25%   | 216  | 19%  |
| C-Cubic        | Below (Good)   | 0-10                                               | 90960 | 19%                | 51%   | 3    | 36%  | 18%                                       | 50%   | 3    | 35%  |
|                | Good→Moderate  | 10-14                                              | 15205 | -12%               | 26%   | 3    | 21%  | -12%                                      | 26%   | 3    | 21%  |
|                | Moderate→UHSG  | 28-42                                              | 2196  | -15%               | 26%   | 9    | 21%  | -15%                                      | 27%   | 9    | 21%  |
|                | UHSG→Unhealthy | 44-66                                              | 1291  | -10%               | 21%   | 11   | 16%  | -10%                                      | 20%   | 11   | 16%  |
|                | Unhealthy→VUH  | 120-180                                            | 503   | 0%                 | 15%   | 22   | 12%  | -1%                                       | 15%   | 22   | 11%  |
|                | VUH→Hazardous  | 200-300                                            | 475   | 5%                 | 17%   | 43   | 14%  | 5%                                        | 16%   | 40   | 13%  |
|                | Cal/OSHA       | 400-600                                            | 230   | 0%                 | 17%   | 80   | 13%  | 1%                                        | 18%   | 85   | 13%  |
|                | Beyond         | 600+                                               | 189   | -4%                | 32%   | 273  | 23%  | -2%                                       | 33%   | 290  | 23%  |
| D-Quadratic+RH | Below (Good)   | 0-10                                               | 90960 | 16%                | 50%   | 3    | 34%  | 15%                                       | 49%   | 3    | 33%  |
|                | Good→Moderate  | 10-14                                              | 15205 | -11%               | 26%   | 3    | 21%  | -11%                                      | 26%   | 3    | 20%  |
|                | Moderate→UHSG  | 28-42                                              | 2196  | -11%               | 25%   | 9    | 19%  | -11%                                      | 25%   | 8    | 19%  |
|                | UHSG→Unhealthy | 44-66                                              | 1291  | -6%                | 19%   | 11   | 15%  | -6%                                       | 19%   | 10   | 14%  |
|                | Unhealthy→VUH  | 120-180                                            | 503   | 1%                 | 15%   | 22   | 12%  | 0%                                        | 15%   | 21   | 11%  |
|                | VUH→Hazardous  | 200-300                                            | 475   | 5%                 | 17%   | 42   | 14%  | 6%                                        | 16%   | 41   | 13%  |
|                | Cal/OSHA       | 400-600                                            | 230   | 0%                 | 16%   | 77   | 12%  | 1%                                        | 18%   | 85   | 13%  |
|                | Beyond         | 600+                                               | 189   | -8%                | 23%   | 201  | 18%  | -7%                                       | 25%   | 217  | 19%  |

UHSG=Unhealthy sensitive groups, VUH=Very Unhealthy

Table S 9. Comparison of error by correction equation E, F (from Table 2) binned by concentration range surrounding each air quality index breakpoint, the Cal/OSHA limit to put on a respirator (500 µg/m<sup>3</sup>), low concentration data (0-10 µg/m<sup>3</sup>), and extremely high concentrations (>600 µg/m<sup>3</sup>). Error is summarized by normalized mean bias error (NMBE), normalized mean absolute error (NMAE), and normalized root mean squared error (NRMSE). Grey shaded rows have an absolute NMBE greater than 10%.

| Model                 | AQI breakpoint | Range PM <sub>2.5</sub><br>(µg/m <sup>3</sup> ) | N         | Leave one site out |       |      |      | Leave one week out |       |      |      |
|-----------------------|----------------|-------------------------------------------------|-----------|--------------------|-------|------|------|--------------------|-------|------|------|
|                       |                |                                                 |           | NMBE               | NRMSE | RMSE | NMAE | NMBE               | NRMSE | RMSE | NMAE |
| E-Quadratic PM*RH     | Below (Good)   | 0-10                                            | 909<br>60 | 15%                | 51%   | 3    | 36%  | 14%                | 50%   | 3    | 35%  |
|                       | Good→Moderate  | 10-14                                           | 152<br>05 | -10%               | 27%   | 3    | 21%  | -10%               | 27%   | 3    | 20%  |
|                       | Moderate→UHSG  | 28-42                                           | 219<br>6  | -11%               | 25%   | 9    | 20%  | -11%               | 25%   | 8    | 19%  |
|                       | UHSG→Unhealthy | 44-66                                           | 129<br>1  | -8%                | 20%   | 11   | 16%  | -8%                | 20%   | 11   | 15%  |
|                       | Unhealthy→VUH  | 120-180                                         | 503       | 0%                 | 16%   | 24   | 13%  | 0%                 | 16%   | 23   | 13%  |
|                       | VUH→Hazardous  | 200-300                                         | 475       | 5%                 | 19%   | 47   | 15%  | 5%                 | 17%   | 43   | 13%  |
|                       | Cal/OSHA       | 400-600                                         | 230       | 0%                 | 16%   | 76   | 11%  | 0%                 | 17%   | 82   | 12%  |
|                       | Beyond         | 600+                                            | 189       | -8%                | 22%   | 191  | 17%  | -7%                | 24%   | 208  | 18%  |
| F- RH growth (Nilson) | Below (Good)   | 0-10                                            | 909<br>60 | -10%               | 67%   | 4    | 48%  | -10%               | 66%   | 3    | 47%  |
|                       | Good→Moderate  | 10-14                                           | 152<br>05 | 8%                 | 44%   | 5    | 32%  | 8%                 | 43%   | 5    | 31%  |
|                       | Moderate→UHSG  | 28-42                                           | 219<br>6  | 46%                | 65%   | 22   | 52%  | 46%                | 65%   | 22   | 52%  |
|                       | UHSG→Unhealthy | 44-66                                           | 129<br>1  | 63%                | 73%   | 40   | 65%  | 63%                | 73%   | 40   | 65%  |
|                       | Unhealthy→VUH  | 120-180                                         | 503       | 54%                | 60%   | 88   | 55%  | 54%                | 60%   | 88   | 55%  |
|                       | VUH→Hazardous  | 200-300                                         | 475       | 42%                | 47%   | 116  | 42%  | 41%                | 46%   | 115  | 42%  |
|                       | Cal/OSHA       | 400-600                                         | 230       | 13%                | 23%   | 110  | 18%  | 13%                | 22%   | 108  | 18%  |
|                       | Beyond         | 600+                                            | 189       | -13%               | 25%   | 214  | 16%  | -13%               | 25%   | 214  | 16%  |

UHSG=Unhealthy sensitive groups, VUH=Very Unhealthy

Table S 10. Error in the transition zone between the U.S.-wide correction and the quadratic fit at higher granularity (20 µg/m³ bins).

| Reference<br>Concentration<br>range PM <sub>2.5</sub><br>(µg/m³) | Equation | N     | U.S.-wide<br>correction<br>NMBE | Quad fit<br>(LOSO) | Transition raw 570-<br>611 (300 U.S.-wide<br>to 400 quadratic)<br>(LOSO) | Quad fit<br>(LOBD) | Transition raw 570-<br>611 (300 U.S.-wide to<br>400 quadratic) (LOBD) |
|------------------------------------------------------------------|----------|-------|---------------------------------|--------------------|--------------------------------------------------------------------------|--------------------|-----------------------------------------------------------------------|
| 0-200                                                            | 1        | 67667 | -3%                             | 0%                 | -3%                                                                      | 0%                 | -3%                                                                   |
| 200-220                                                          | 1        | 91    | -2%                             | 4%                 | -2%                                                                      | 4%                 | -2%                                                                   |
| 220-240                                                          | 1        | 103   | -6%                             | 1%                 | -6%                                                                      | 2%                 | -6%                                                                   |
| 240-260                                                          | 1        | 112   | -5%                             | 7%                 | -5%                                                                      | 7%                 | -5%                                                                   |
| 260-280                                                          | 1        | 86    | -7%                             | 6%                 | -7%                                                                      | 7%                 | -7%                                                                   |
| 280-300                                                          | 1        | 83    | -8%                             | 6%                 | -7%                                                                      | 7%                 | -7%                                                                   |
| 300-320                                                          | 1        | 71    | -11%                            | 5%                 | -9%                                                                      | 6%                 | -9%                                                                   |
| 320-340                                                          | 1        | 58    | -11%                            | 7%                 | -4%                                                                      | 8%                 | -3%                                                                   |
| 340-360                                                          | 1        | 53    | -11%                            | 9%                 | 1%                                                                       | 10%                | 1%                                                                    |
| 360-380                                                          | 1        | 49    | -17%                            | 1%                 | -6%                                                                      | 3%                 | -5%                                                                   |
| 380-400                                                          | 1        | 31    | -18%                            | 1%                 | -3%                                                                      | 3%                 | -2%                                                                   |
| 400-420                                                          | 1        | 33    | -19%                            | 2%                 | -1%                                                                      | 4%                 | 1%                                                                    |
| >420                                                             | 1        | 386   | -35%                            | -5%                | -6%                                                                      | -4%                | -4%                                                                   |

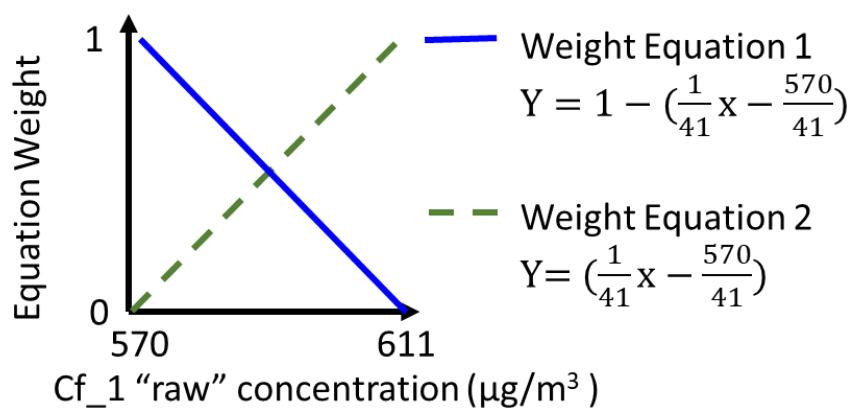

Figure S 4. Weighted transition equation to switch from the U.S.-wide correction at raw [cf=1] PurpleAir concentrations <570 µg/m³ to the quadratic equation at [cf=1] PurpleAir concentrations >611 µg/m³.

If all the Teledyne T640 and T640x data are excluded the NMBE is somewhat different although still acceptable (NMBE  $\leq 10\%$ ) at each AQI breakpoint (Table S11). The NMBE in the 0-10  $\mu\text{g}/\text{m}^3$  range is 12% suggesting that the PurpleAir may overestimate compared to the monitors other than T640 and T640x. The NMBE at the breakpoint to moderate is -3% without any of the T640 or T640x data compared to -10% with the T640 data included. These differences in results may be due in part to differences in measurement methods but also due to the parts of the country that are operating monitors other than T640s and T640xs (most data from Atascadero, Cedar Rapids, Marysville, Phoenix). These parts of the country may be impacted by more dust and other particle types that scatter less light per mass. This highlights the importance of carefully selecting collocation sites and monitors.

Table S 11. 1-hr error at each AQI breakpoint using site withholding and a transition from the U.S.-wide correction to a quadratic fit from 300-400  $\mu\text{g}/\text{m}^3$  (raw [cf=1] 570-611  $\mu\text{g}/\text{m}^3$ ). Error is also shown without Teledyne T640 and T640x data included.

| AQI breakpoint | Concentration Range ( $\mu\text{g}/\text{m}^3$ ) | N     | Selected fit | NMBE | RMSE | NRMSE | No T640 or T640x |      |      |
|----------------|--------------------------------------------------|-------|--------------|------|------|-------|------------------|------|------|
|                |                                                  |       |              |      |      |       | N                | NMBE | RMSE |
| Below          | 0-10                                             | 90960 | U.S.-wide    | -5%  | 3    | 54%   | 49095            | 12%  | 3    |
| Moderate       | 10-14                                            | 15205 | U.S.-wide    | -10% | 4    | 31%   | 6222             | -3%  | 4    |
| UHSG           | 28-42                                            | 2196  | U.S.-wide    | 4%   | 9    | 27%   | 1840             | 7%   | 9    |
| Unhealthy      | 44-66                                            | 1291  | U.S.-wide    | 9%   | 12   | 22%   | *                |      |      |
| Very Unhealthy | 120-180                                          | 503   | U.S.-wide    | 2%   | 18   | 12%   |                  |      |      |
| Hazardous      | 200-300                                          | 475   | U.S.-wide    | -5%  | 31   | 12%   |                  |      |      |
| Cal/OSHA       | 400-600                                          | 230   | Quadratic    | 0%   | 89   | 18%   |                  |      |      |
| Beyond         | 600+                                             | 189   | Quadratic    | -7%  | 216  | 25%   |                  |      |      |

\*No T640 data  $>35 \mu\text{g}/\text{m}^3$  included

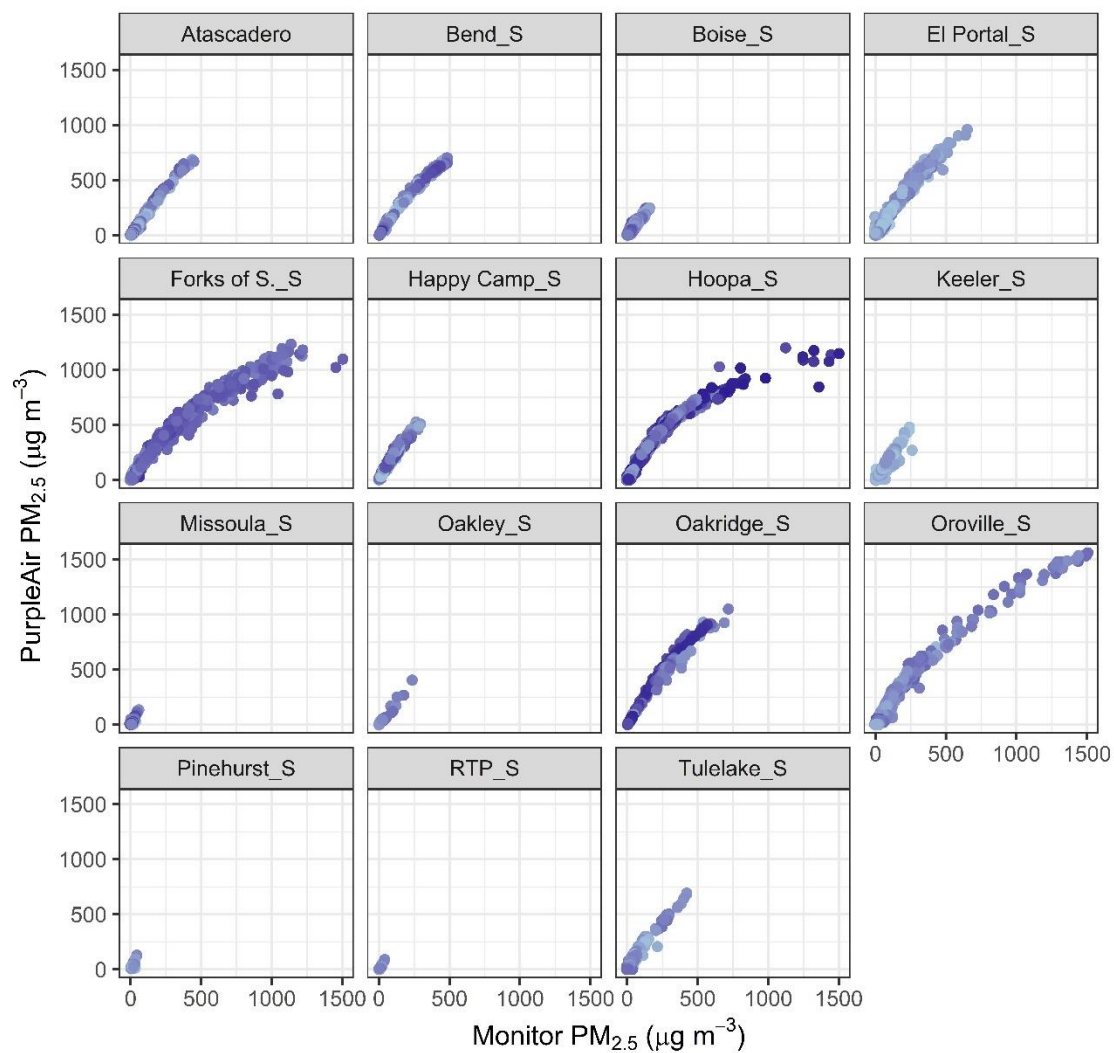

Figure S5. hourly averaged uncorrected PurpleAir [cf=1] data compared to the monitor PM<sub>2.5</sub> for each smoke-impacted site colored by PurpleAir RH.



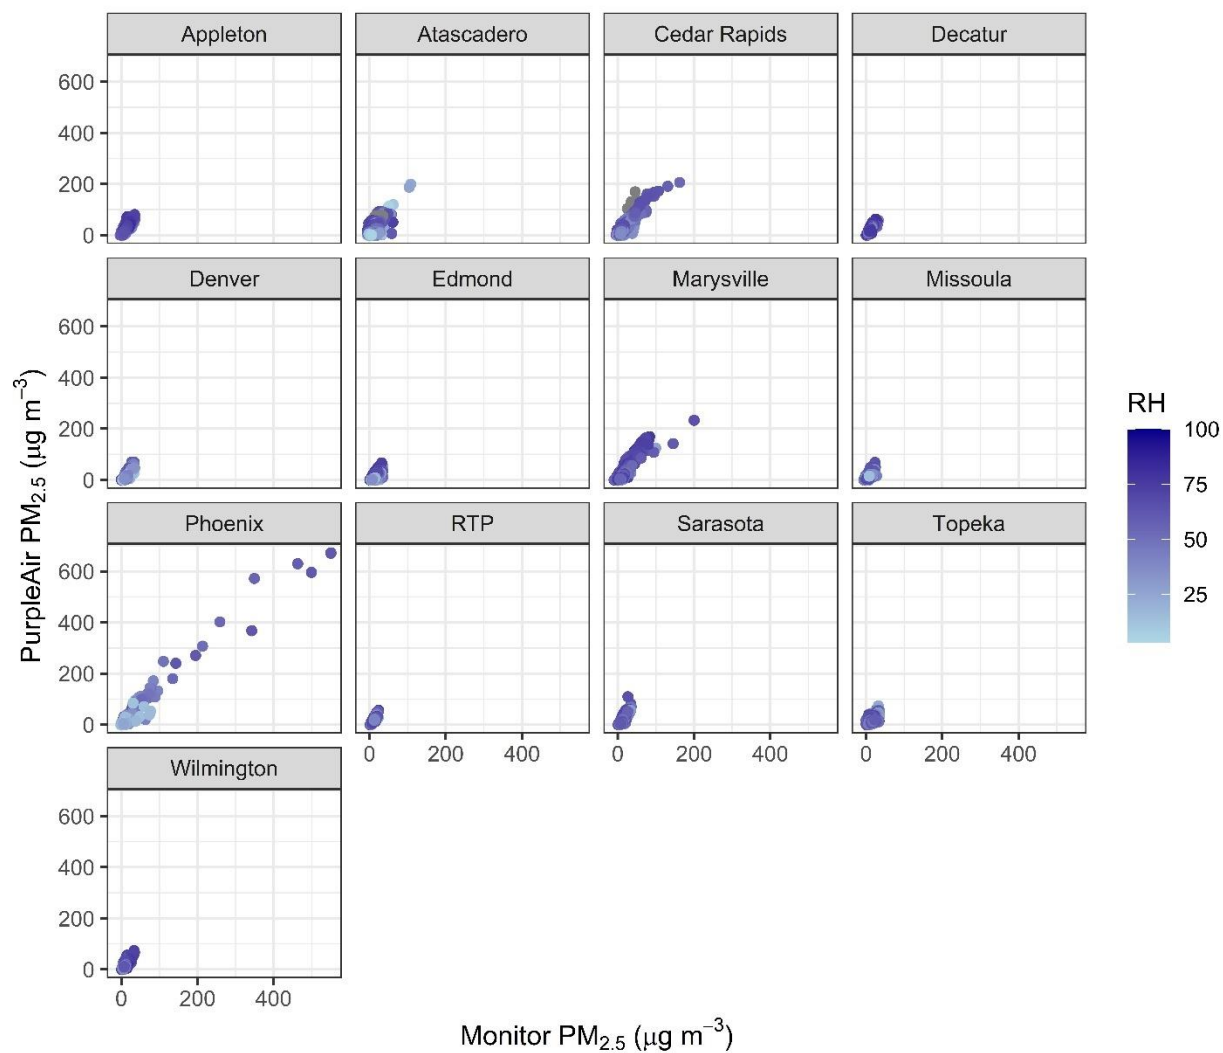

Figure S6. hourly averaged uncorrected PurpleAir [cf=1] data compared to the monitor PM<sub>2.5</sub> for each ambient site colored by PurpleAir RH.

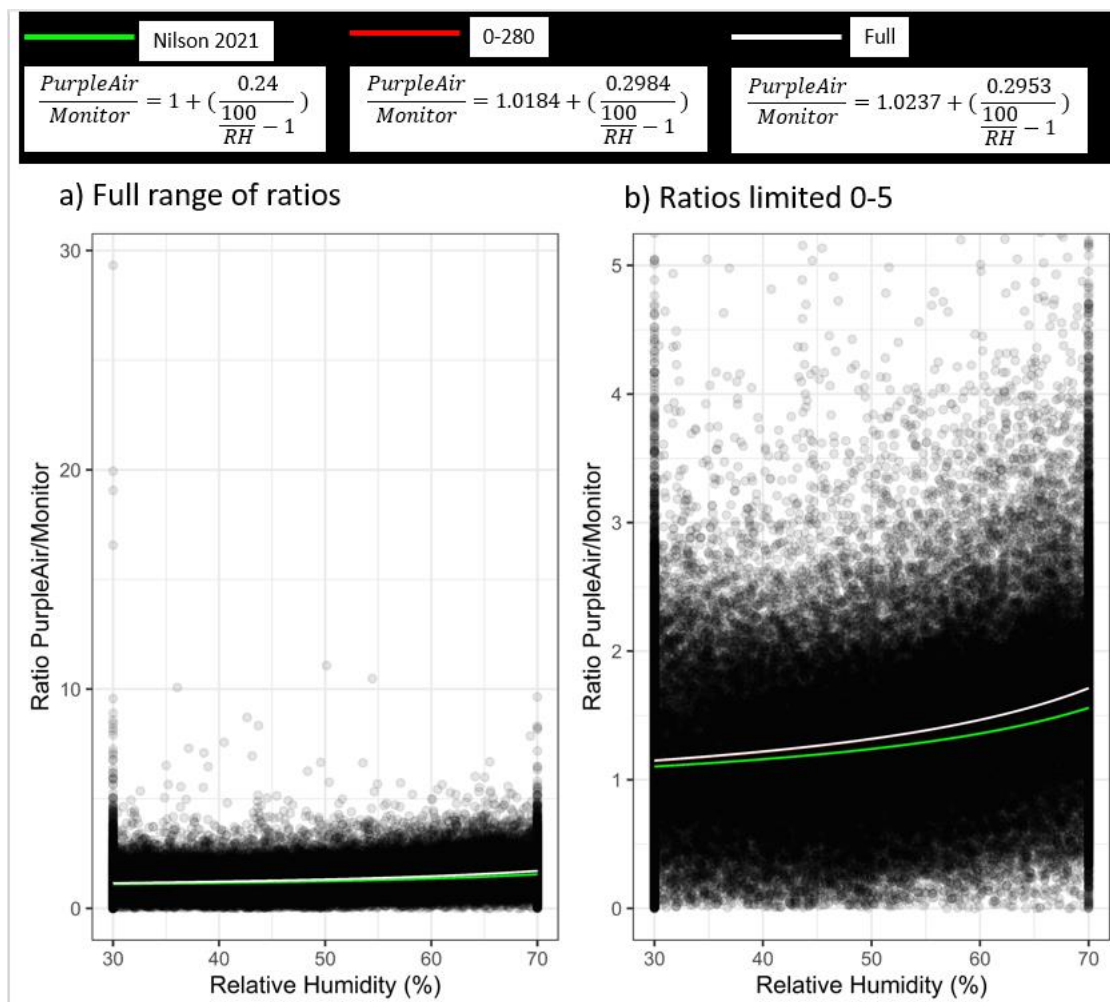

Figure S7. Hourly ratio of PurpleAir to Monitor (when the monitor is  $> 5 \mu\text{g}/\text{m}^3$ ) versus relative humidity with fits based on Nilson (Nilson, Jackson et al. 2022). The equation from the Nilson paper is compared to equations generated from this dataset using the full range of data and only data 0-280  $\mu\text{g}/\text{m}^3$ . The equations generated based on this dataset for the full range and from 0-280  $\mu\text{g}/\text{m}^3$  are similar with the white line almost completely covering the red line.

## 6 Detailed discussion of EPA performance targets

### Ambient 24-hr

Both withholding methods resulted in similar performance with values typically only varying by a few  $\mu\text{g}/\text{m}^3$  or percent (leave one sensor out: Table S12, Table S13, leave one week out: Table S14). At 24-hr averages, all but one site (Sarasota, FL) meet the targets. In Sarasota, the  $R^2$  is  $< 0.7$  likely due to the more limited range of concentrations after averaging (0-20  $\mu\text{g}/\text{m}^3$ ). At 24-hr averages, six of the thirteen typical ambient sites did not reach 25  $\mu\text{g}/\text{m}^3$  which is recommended in the performance targets to ensure an evaluation over a wide enough range of concentrations. Note that these collocations occurred for 2 months to more than 2 years while the performance targets recommend 30-day evaluations. Shorter 30-day evaluations would be less likely to meet the 25  $\mu\text{g}/\text{m}^3$  target maximum concentration and could result in different performance metrics. At 24-hr averages, the typical ambient sites often had strong linearity ( $R^2 = 0.66$  to  $0.96$ ), low bias (slope =  $0.69$  to  $1.14$ , intercept =  $-1.99$  to  $2.12$ ) and low error (RMSE =  $2$  to  $6 \mu\text{g}/\text{m}^3$ ).

## Ambient 1-hr

While the performance targets recommend evaluating sensor performance at 24-hr averages, we also need to understand the performance at higher time resolution including hourly averages since air sensor data are often used at these higher time resolutions. The hourly data at all but one typical ambient site, Atascadero, meets all the performance target metrics (**Figure S5**). At hourly averages, the typical ambient sites often had strong linearity ( $R^2 = 0.53$  to  $0.96$ ) though in some sites the  $R^2$  is somewhat lower at 1-hr than at 24-hr averages. The  $R^2$  in Atascadero shows the largest decrease from  $0.80$  at 24-hr averages to  $0.53$  at 1-hr averages. This may be due to noise in the sensor and comparison instrument, changes in the particle properties across hours, or other issues with the sensor not identified by the AB channel comparison. Sites typically have low bias (slope =  $0.69$  to  $1.14$ , intercept =  $-1.99$  to  $2.12$ ) and low error (RMSE =  $2$  to  $6 \mu\text{g}/\text{m}^3$ ). Due to the low average concentrations in these datasets, the percent error for many of these sensors is high (NRMSE =  $21\%$  to  $84\%$ ), but since the performance targets specify sensors should meet either the NRMSE or the RMSE, all ambient sites meet the error target. These performance metrics were primarily designed with typical ambient concentration evaluations in mind. The NRMSE was added to the RMSE specifically for times where the average concentrations may be unusually high, including during wildfire smoke situations.

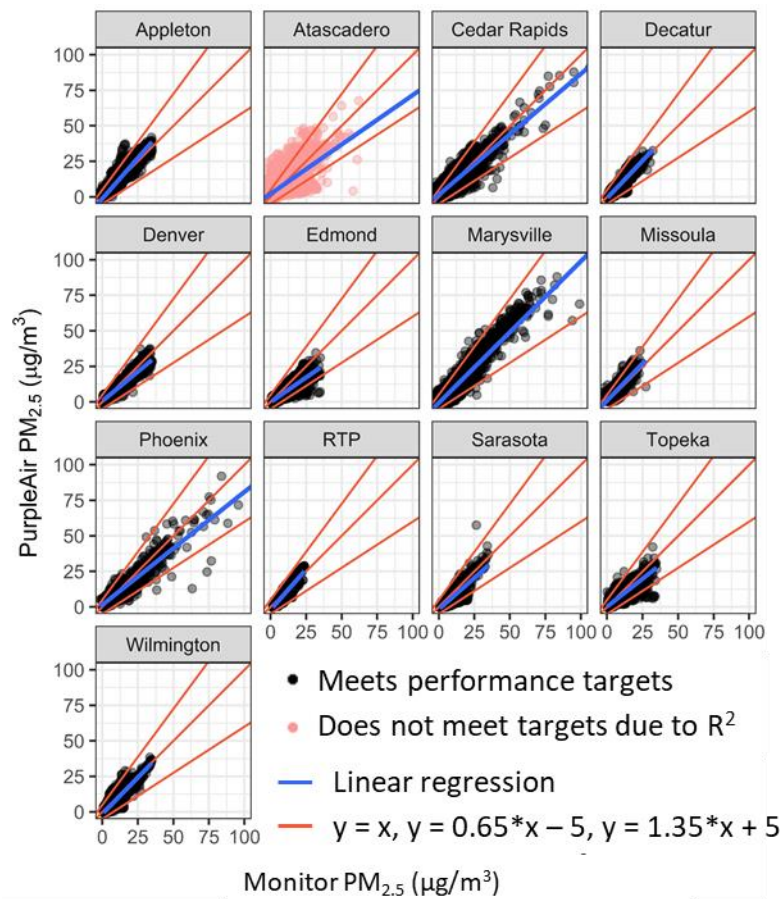

**Figure S8.** Hourly corrected PurpleAir  $\text{PM}_{2.5}$  versus monitor data at each typical ambient site. Data were corrected using leave one week out withholding. Red lines indicate  $y=x$ ,  $y=1.35x+5$  and  $y=0.65x-5$  with the upper and lower lines being the range of acceptable bias in the U.S. EPA performance targets and the blue line is linear regression. Plots are colored by whether they meet the performance targets at 1-hr averages.

## Smoke 24-hr

Eight of fourteen smoke-impacted sensors did not meet the performance targets (Figure S6). The Oakley sensor is not included in the 24-hr averaged regression results since the dataset only contained one 24-hr average to compare.

The Missoula sensor has a high bias slightly outside the performance targets (slope=1.38). Five of the smoke-impacted sensors have intercepts  $> \pm 5 \mu\text{g}/\text{m}^3$ , which may not be of large concern because of the degree of uncertainty in the intercept that is likely with such a wide range of concentrations represented in the dataset Pinehurst is still the only site that does not meet the  $R^2$  criteria at 24-hr averages potentially due in part to the limited range of concentrations (max=17  $\mu\text{g}/\text{m}^3$ ). Three of the smoke-impacted sites did not meet the RMSE/NRMSE targets. However, two of these sites are very close with errors of 31% and 32%. Many smoke-impacted sensors did not meet the performance targets; however, many are close still showing that they have utility during smoke-impacted times when other more accurate data are not available.

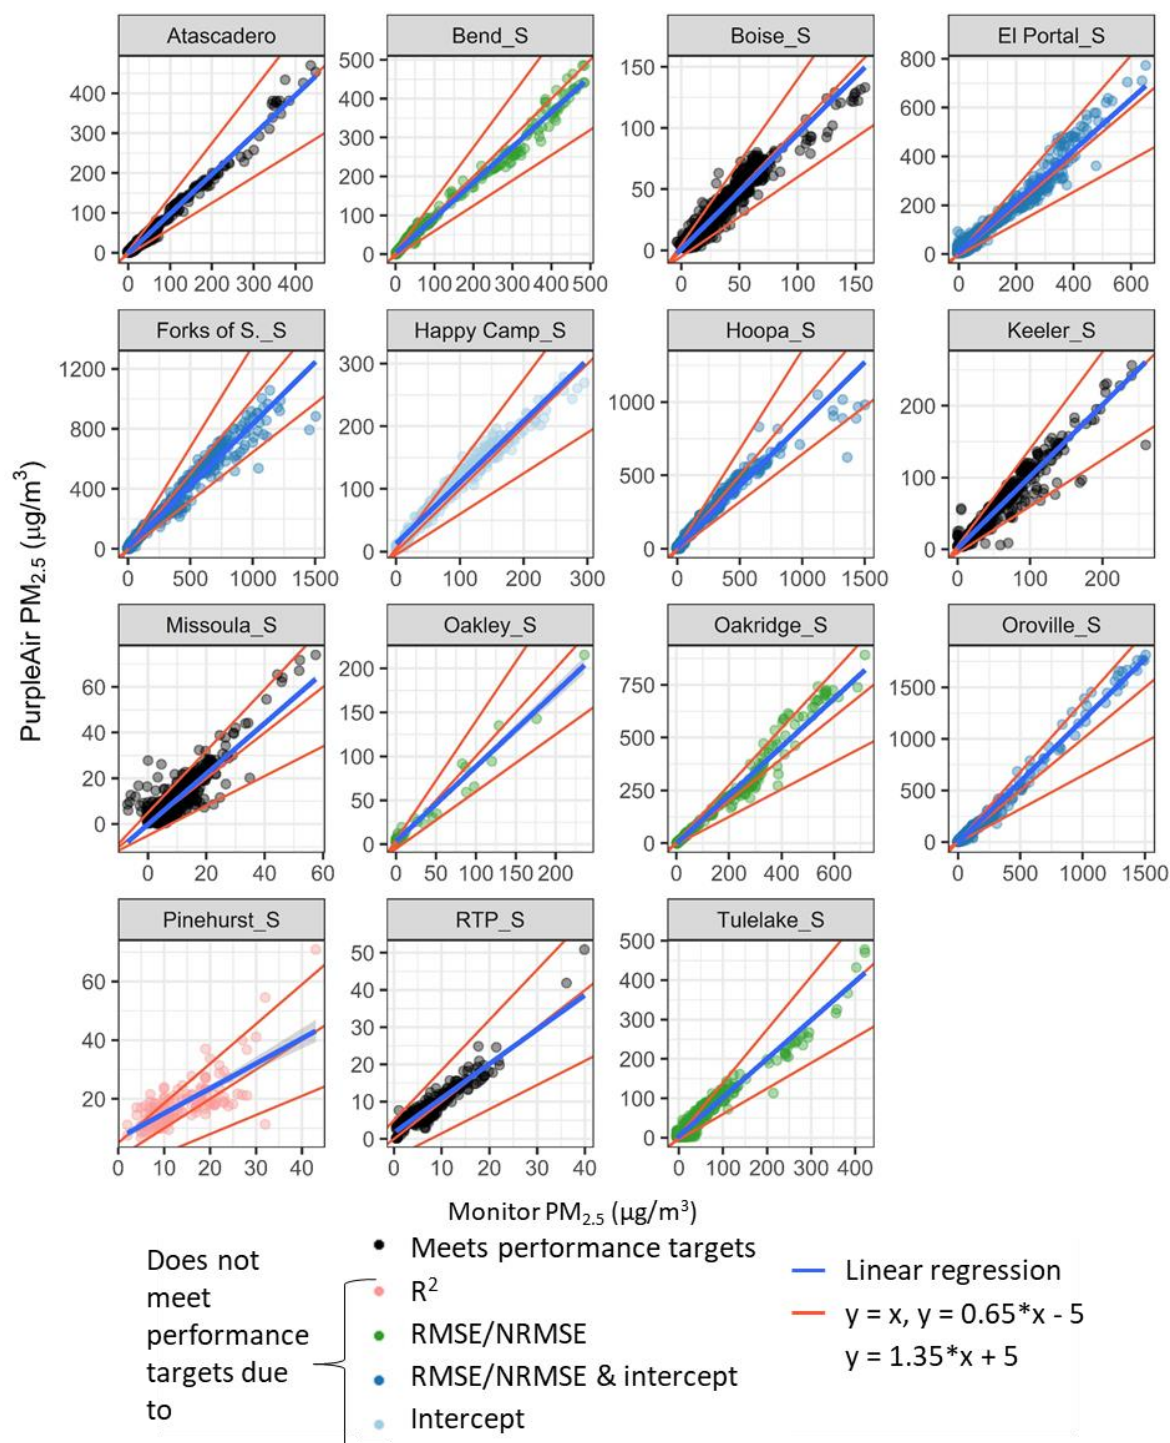

**Figure S9.** Hourly corrected PurpleAir  $\text{PM}_{2.5}$  versus monitor data in each smoke-impacted site. Data were corrected using leave one week out withholding. Plots are colored based on meeting the performance targets



at 1-hr averages or the parameter that does not meet the performance targets. Red lines indicate  $y=x$ ,  $y=1.35x+5$  and  $y=0.65x-5$  with the upper and lower lines being the range of acceptable bias in the U.S. EPA performance targets. The blue line is the linear regression.

### Smoke 1-hr

Only five of ten smoke-impacted sensors met all the performance targets at 1-hr averages. Six sensors have intercepts outside the  $\pm 5 \mu\text{g}/\text{m}^3$  range (intercepts = -7.07 to 12.59). However, this may not be of large concern because of wide concentration ranges experienced and the impact on intercept. Only one site, Pinehurst, does not meet the linearity criteria ( $R^2 = 0.54$ ) although a time series plot reveals many similar trends compared to the monitor (Figure S7). The low  $R^2$  may be due in part to the limited range of concentrations (0 to  $42 \mu\text{g}/\text{m}^3$ ), limited period of evaluation (157 hours, <1 week), and the comparison with a BAM1020 that has noisier hourly averages at lower concentrations. The other smoke-impacted sensors typically have higher linearity ( $R^2 = 0.76$  to  $0.99$ ) which is typically higher than the ambient sensors (All smoke  $R^2 = 0.95$ , All ambient  $R^2 = 0.79$ ), likely due to their wider concentration ranges. Eight smoke-impacted sensors did not meet the RMSE and NRMSE criteria. The RMSE and NRMSE suggest there may be more uncertainty in the hourly data during smoke impacts than during typical ambient conditions. However, the slope values (i.e., bias) within the desired range suggest that there is confidence in the longer-term averages (e.g., 24-hr, weekly, seasonal, annual) provided by these sensors. The performance targets are not a pass/fail certification but are a recommendation to encourage overall performance improvement of technology entering the market. Falling short of these targets does not mean that the data are unusable.

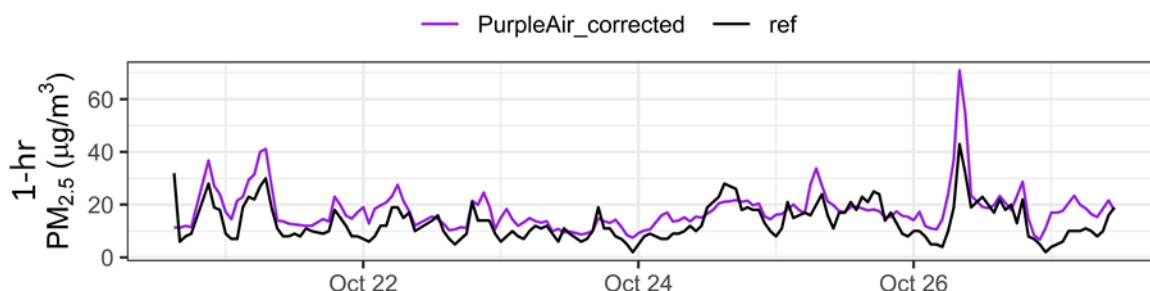

**Figure S10.** Pinehurst is the most poorly correlated of the smoke-impacted sensors. However, it still frequently shows similar trends. It is a short collocation which may contribute to the poor agreement.

It is important to note that not all recommendations in the performance targets were followed in this evaluation. Many of the smoke-impacted sites were selected as nearby monitor sensor pairs on the fire and smoke map and therefore may not be true collocations. Some of the scatter (RMSE) in the comparisons may be due to real concentration differences. In addition, the performance targets report recommends evaluating sensors in triplicates. Here, we have evaluated a single sensor at each site. However, past work with PurpleAir sensors has already established their high precision (especially using the duplicate Plantower sensors for quality control) and so this may be less of an issue for this sensor type (Feenstra, Papapostolou et al. 2019, Tryner, L'Orange et al. 2020, Wallace, Ott et al. 2020, Barkjohn, Gantt et al. 2021). Lastly not all sensors were evaluated against FEMs as recommended in the performance targets document (Duvall, Clements et al. 2021). However, this recommendation is less relevant for smoke monitoring where FEMs also have uncertainty since their designation involves field testing at typical ambient, not smoke-impacted, conditions.

Many of the slopes and intercepts vary between the 1-hr and 24-hr averaged datasets. Many of the sensors have higher slopes at 24-hr averages than at 1-hr averages ( $N=19/28$ , 68%) with six of these sensors having a difference in slope  $\geq 0.10$ . The sensors with the largest increases in slope are Atascadero ambient (0.39 increase), Missoula smoke-impacted sensor (0.27 increase), the Missoula ambient sensor (0.17 increase), Marysville ambient (0.16), Cedar rapids ambient (0.11), and Pinehurst smoke (0.10 increase). Ordinary least squares regression minimizes the sum of the vertical

distances between each point and the regression line and passes through the mean of X and Y. If both the X and Y variables are noisy, the slope, as estimated by the ordinary least squares regression coefficient, will be biased low (Clarke and Van Gorder 2013). In addition, some of these sites had outliers where the sensor measured lower than the reference in the 1-hr averages that were less influential in the 24-hr averages (Figure S 6, Figure S 7). Only the RTP smoke-impacted datasets shows a decrease in slope  $\geq 0.10$  (0.12), likely due to two high concentration outliers that are less influential at 24-hr averages. While exploring the slope and intercept at 24-hr averages gives us more confidence in their values, it is important to note that we need to build and evaluate an extended correction on 1-hr averages to capture a wider range of  $PM_{2.5}$  concentrations.

Table S 12. Ambient 24-hr and hourly average performance by sensor using site withholding. Shaded values did not meet EPA’s performance targets for 24-hr averaged data. Where the number of hours (N), slope (m), intercept (b), R<sup>2</sup>, root mean squared error (RMSE, µg/m<sup>3</sup>), normalized root mean squared error (NRMSE), mean of the monitor, and max (µg/m<sup>3</sup>) of the monitor are reported.

|              | 24-hr averaged |          |            |                |      |       |                   |     | 1-hr averaged |          |            |                |      |       |                   |     | Difference 24-hr to 1-hr |                |      |       |
|--------------|----------------|----------|------------|----------------|------|-------|-------------------|-----|---------------|----------|------------|----------------|------|-------|-------------------|-----|--------------------------|----------------|------|-------|
| City         | N              | m        | b          | R <sup>2</sup> | RMSE | NRMSE | PM <sub>2.5</sub> |     | N             | m        | b          | R <sup>2</sup> | RMSE | NRMSE | PM <sub>2.5</sub> |     | m                        | R <sup>2</sup> | RMSE | NRMSE |
|              |                |          |            |                |      |       | mean              | max |               |          |            |                |      |       |                   |     |                          |                |      |       |
|              | ≥30            | 1 ± 0.35 | -5 ≤ b ≤ 5 | ≥0.70          | ≤ 7  | ≤30%  | --                | ≥24 | ≥648          | 1 ± 0.35 | -5 ≤ b ≤ 5 | ≥0.70          | ≤ 7  | ≤30%  | --                | ≥24 |                          |                |      |       |
| Appleton     | 357            | 1.16     | -1.37      | 0.94           | 2    | 20%   | 8                 | 29  | 8722          | 1.14     | -1.28      | 0.91           | 2    | 28%   | 8                 | 35  | 0.02                     | 0.03           | 0    | -8%   |
| Atascadero   | 634            | 1.08     | 0.03       | 0.80           | 2    | 43%   | 5                 | 34  | 15010         | 0.69     | 2.12       | 0.53           | 5    | 84%   | 5                 | 108 | 0.39                     | 0.27           | -3   | -41%  |
| Cedar Rapids | 806            | 0.96     | 0.67       | 0.78           | 2    | 28%   | 8                 | 35  | 19507         | 0.85     | 1.51       | 0.75           | 3    | 41%   | 8                 | 162 | 0.11                     | 0.03           | -1   | -13%  |
| Decatur      | 269            | 1.14     | -1.69      | 0.92           | 1    | 14%   | 9                 | 19  | 6868          | 1.06     | -0.96      | 0.86           | 2    | 21%   | 9                 | 32  | 0.08                     | 0.06           | -1   | -7%   |
| Denver       | 361            | 0.84     | 0.56       | 0.92           | 1    | 18%   | 8                 | 22  | 8828          | 0.83     | 0.61       | 0.89           | 2    | 25%   | 8                 | 35  | 0.01                     | 0.03           | -1   | -7%   |
| Edmond       | 286            | 0.71     | -0.20      | 0.78           | 3    | 37%   | 9                 | 25  | 8174          | 0.69     | -0.16      | 0.76           | 4    | 42%   | 10                | 35  | 0.02                     | 0.02           | -1   | -5%   |
| Marysville   | 286            | 1.16     | -0.99      | 0.94           | 2    | 27%   | 8                 | 41  | 10515         | 1.00     | -0.75      | 0.86           | 4    | 47%   | 8                 | 200 | 0.16                     | 0.08           | -2   | -20%  |
| Missoula     | 70             | 1.24     | -0.33      | 0.94           | 2    | 31%   | 6                 | 15  | 1738          | 1.04     | 0.94       | 0.77           | 3    | 49%   | 6                 | 27  | 0.20                     | 0.17           | -1   | -18%  |
| Phoenix      | 152            | 0.8      | 1.42       | 0.99           | 3    | 30%   | 10                | 149 | 3652          | 0.79     | 1.47       | 0.96           | 6    | 57%   | 10                | 550 | 0.01                     | 0.03           | -3   | -27%  |
| RTP          | 77             | 1.15     | -2.23      | 0.80           | 2    | 21%   | 9                 | 15  | 1921          | 1.13     | -1.99      | 0.79           | 2    | 26%   | 9                 | 24  | 0.02                     | 0.01           | 0    | -5%   |
| Sarasota     | 380            | 0.84     | -1.30      | 0.66           | 3    | 42%   | 7                 | 20  | 9145          | 0.88     | -1.66      | 0.70           | 3    | 45%   | 7                 | 35  | 0.04                     | 0.04           | 0    | -3%   |
| Topeka       | 326            | 0.8      | 0.06       | 0.82           | 2    | 27%   | 8                 | 23  | 8281          | 0.79     | 0.16       | 0.78           | 3    | 34%   | 9                 | 35  | 0.01                     | 0.04           | -1   | -7%   |
| Wilmington   | 231            | 1.02     | -1.33      | 0.85           | 2    | 25%   | 8                 | 30  | 5705          | 1.02     | -1.34      | 0.85           | 2    | 29%   | 8                 | 35  | 0.00                     | 0.00           | 0    | -4%   |
| All ambient  | 4235           | 0.93     | -0.02      | 0.82           | 2    | 30%   | 8                 | 149 | 108066        | 0.93     | 1.16       | 0.79           | 3    | 43%   | 8                 | 550 | 0.00                     | 0.03           | -1   | -13%  |

**Table S 13.** Smoke-impacted 24-hr and hourly averaged performance by sensor using site withholding. Shaded values did not meet EPA's performance targets for 24-hr averaged data. Where the number of hours (N), slope (m), intercept (b), R<sup>2</sup>, root mean squared error (RMSE), normalized root mean squared error (NRMSE), mean of the monitor, and max of the monitor are reported.

| City            | 24-hr averaged |          |            |                |      |       |                   |     | 1-hr averaged |          |            |                |      |       |                   |       | Difference 24-hr to 1-hr |                |      |       |
|-----------------|----------------|----------|------------|----------------|------|-------|-------------------|-----|---------------|----------|------------|----------------|------|-------|-------------------|-------|--------------------------|----------------|------|-------|
|                 | N              | m        | b          | R <sup>2</sup> | RMSE | NRMSE | PM <sub>2.5</sub> |     | N             | m        | b          | R <sup>2</sup> | RMSE | NRMSE | PM <sub>2.5</sub> |       |                          |                |      |       |
|                 | ≥30            | 1 ± 0.35 | -5 ≤ b ≤ 5 | ≥0.70          | ≤ 7  | ≤30%  | --                | ≥24 | ≥648          | 1 ± 0.35 | -5 ≤ b ≤ 5 | ≥0.70          | ≤ 7  | ≤30%  | --                | ≥24   | m                        | R <sup>2</sup> | RMSE | NRMSE |
| Atascadero      | 78             | 0.99     | -0.91      | 1              | 3    | 11%   | 24                | 242 | 1850          | 0.99     | -0.99      | 0.99           | 5    | 23%   | 23                | 448   | 0.00                     | 0.01           | -2   | -12%  |
| Bend            | 70             | 0.89     | 2.72       | 1              | 5    | 26%   | 20                | 252 | 1758          | 0.9      | 2.6        | 0.99           | 10   | 33%   | 30                | 485   | -0.01                    | 0.01           | -5   | -7%   |
| Boise           | 72             | 0.96     | 0.67       | 0.97           | 3    | 16%   | 21                | 120 | 1753          | 0.94     | 1.04       | 0.94           | 5    | 26%   | 21                | 158   | 0.02                     | 0.03           | -2   | -10%  |
| El Portal       | 56             | 1.03     | 7.27       | 0.99           | 14   | 19%   | 73                | 382 | 1279          | 1.04     | 6.89       | 0.96           | 23   | 31%   | 73                | 651   | -0.01                    | 0.03           | -9   | -12%  |
| Forks of Salmon | 32             | 0.83     | 6.7        | 0.99           | 61   | 22%   | 273               | 816 | 1199          | 0.82     | 10.97      | 0.97           | 61   | 32%   | 191               | 1504  | 0.01                     | 0.02           | 0    | -10%  |
| Happy Camp      | 14             | 0.98     | 13.44      | 0.98           | 13   | 14%   | 87                | 157 | 348           | 0.98     | 12.59      | 0.97           | 16   | 18%   | 86                | 295   | 0.00                     | 0.01           | -3   | -4%   |
| Hoopla          | 64             | 0.86     | 9.59       | 0.99           | 29   | 32%   | 90                | 887 | 1632          | 0.84     | 10.43      | 0.96           | 39   | 50%   | 80                | 1502  | 0.02                     | 0.03           | -10  | -18%  |
| Keeler          | 78             | 1.04     | 0.36       | 0.99           | 4    | 14%   | 26                | 115 | 1876          | 1        | 1.49       | 0.95           | 8    | 29%   | 27                | 260   | 0.04                     | 0.04           | -4   | -15%  |
| Missoula        | 46             | 1.38     | -2.42      | 0.97           | 2    | 24%   | 8                 | 20  | 1152          | 1.11     | -0.13      | 0.76           | 4    | 48%   | 8                 | 57    | 0.27                     | 0.21           | -2   | -24%  |
| Oakley          | 1              | --       | --         | --             | --   | --    | 17                | 17  | 48            | 0.85     | 3.38       | 0.97           | 11   | 40%   | 27                | 236   | --                       | --             | --   | --    |
| Oakridge        | 77             | 1.12     | -1.87      | 0.99           | 14   | 39%   | 35                | 489 | 1865          | 1.14     | -2.15      | 0.98           | 20   | 55%   | 36                | 717   | -0.02                    | 0.01           | -6   | -16%  |
| Oroville        | 40             | 1.16     | -5.29      | 1              | 34   | 31%   | 111               | 852 | 1016          | 1.19     | -7.07      | 0.99           | 49   | 48%   | 103               | 1506  | -0.03                    | 0.01           | -15  | -17%  |
| Pinehurst       | 6              | 0.95     | 5          | 0.61           | 5    | 35%   | 13                | 17  | 157           | 0.85     | 6.54       | 0.54           | 7    | 53%   | 13                | 43    | 0.10                     | 0.07           | -2   | -18%  |
| RTP             | 17             | 0.81     | 2.39       | 0.88           | 2    | 25%   | 7                 | 13  | 429           | 0.93     | 1.62       | 0.88           | 2    | 31%   | 7                 | 40    | -0.12                    | 0.00           | 0    | -6%   |
| Tulelake        | 78             | 1.02     | 3.22       | 0.98           | 6    | 27%   | 23                | 213 | 1720          | 0.98     | 4.17       | 0.95           | 10   | 45%   | 23                | 422   | 0.04                     | 0.03           | -4   | -18%  |
| All smoke*      | 729            | 0.94     | 3.53       | 0.97           | 18   | 38%   | 50                | 887 | 18082         | 1.01     | -1.1       | 0.95           | 25   | 51%   | 49                | 18082 | -0.07                    | 0.02           | -7   | -13%  |
| ALL**           | 4964           | 0.95     | 0.3        | 0.97           | 7    | 54%   | 14                | 887 | 126148        | 1        | 0.46       | 0.96           | 10   | 73%   | 14                | 1506  | -0.05                    | 0.01           | -3   | -19%  |

\*All smoke is a summary of all data shown in this table

\*\*ALL is a summary of all smoke and ambient data



Table S 14. hourly and 24-hour averaged performance using leave one week out withholding. Grey shaded values did not meet EPA's performance targets for 24-hr data.

| 24-hr Performance |      |          |            |                |      |       |      |     | Monitor PM <sub>2.5</sub> |          | 1-hr Performance |                |      |       |      |      | Monitor PM <sub>2.5</sub> |  |
|-------------------|------|----------|------------|----------------|------|-------|------|-----|---------------------------|----------|------------------|----------------|------|-------|------|------|---------------------------|--|
| city              | N    | m        | b          | R <sup>2</sup> | RMSE | NRMSE | Mean | Max | N                         | m        | b                | R <sup>2</sup> | RMSE | NRMSE | Mean | Max  |                           |  |
| Target:           | ≥30  | 1 ± 0.35 | -5 ≤ b ≤ 5 | ≤0.70          | ≤ 7  | ≤30%  | --   | ≥25 | ≥720                      | 1 ± 0.35 | -5 ≤ b ≤ 5       | ≤0.70          | ≤ 7  | ≤30%  | --   | ≥25  |                           |  |
| Appleton          | 357  | 1.16     | -1         | 0.94           | 2    | 20%   | 8    | 29  | 8722                      | 1.14     | -1               | 0.91           | 2    | 28%   | 8    | 35   |                           |  |
| Atascadero        | 634  | 1.08     | 0          | 0.80           | 2    | 43%   | 5    | 34  | 15010                     | 0.69     | 2                | 0.53           | 5    | 84%   | 5    | 108  |                           |  |
| Cedar Rapids      | 806  | 0.96     | 1          | 0.78           | 2    | 28%   | 8    | 35  | 19507                     | 0.85     | 2                | 0.75           | 3    | 41%   | 8    | 162  |                           |  |
| Decatur           | 269  | 1.14     | -2         | 0.92           | 1    | 14%   | 9    | 19  | 6868                      | 1.06     | -1               | 0.86           | 2    | 21%   | 9    | 32   |                           |  |
| Denver            | 361  | 0.84     | 1          | 0.92           | 1    | 18%   | 8    | 22  | 8828                      | 0.83     | 1                | 0.89           | 2    | 25%   | 8    | 35   |                           |  |
| Edmond            | 286  | 0.71     | 0          | 0.78           | 3    | 37%   | 9    | 25  | 8174                      | 0.69     | 0                | 0.76           | 4    | 42%   | 10   | 35   |                           |  |
| Marysville        | 286  | 1.16     | -1         | 0.94           | 2    | 27%   | 8    | 41  | 10515                     | 1.00     | -1               | 0.86           | 4    | 47%   | 8    | 200  |                           |  |
| Missoula          | 70   | 1.24     | 0          | 0.94           | 2    | 31%   | 6    | 15  | 1738                      | 1.04     | 1                | 0.77           | 3    | 49%   | 6    | 27   |                           |  |
| Phoenix           | 152  | 0.8      | 1          | 0.99           | 3    | 29%   | 10   | 149 | 3652                      | 0.80     | 1                | 0.96           | 6    | 57%   | 10   | 550  |                           |  |
| RTP               | 77   | 1.15     | -2         | 0.8            | 2    | 21%   | 9    | 15  | 1921                      | 1.13     | -2               | 0.79           | 2    | 26%   | 9    | 24   |                           |  |
| Sarasota          | 380  | 0.84     | -1         | 0.66           | 3    | 42%   | 7    | 20  | 9145                      | 0.88     | -2               | 0.70           | 3    | 45%   | 7    | 35   |                           |  |
| Topeka            | 326  | 0.8      | 0          | 0.82           | 2    | 27%   | 8    | 23  | 8281                      | 0.79     | 0                | 0.78           | 3    | 34%   | 9    | 35   |                           |  |
| Wilmington        | 231  | 1.02     | -1         | 0.85           | 2    | 25%   | 8    | 30  | 5705                      | 1.02     | -1               | 0.85           | 2    | 29%   | 8    | 35   |                           |  |
| All ambient       | 4235 | 0.93     | 0          | 0.82           | 2    | 30%   | 8    | 149 | 108066                    | 0.93     | 1                | 0.79           | 3    | 43%   | 8    | 550  |                           |  |
| Atascadero_S      | 78   | 0.99     | -1         | 1.00           | 3    | 11%   | 24   | 242 | 1850                      | 0.99     | -1               | 0.99           | 6    | 23%   | 23   | 448  |                           |  |
| Bend_S            | 70   | 0.9      | 3          | 1.00           | 5    | 24%   | 20   | 252 | 1758                      | 0.91     | 3                | 0.99           | 9    | 31%   | 30   | 485  |                           |  |
| Boise_S           | 72   | 0.96     | 1          | 0.97           | 3    | 16%   | 21   | 120 | 1753                      | 0.94     | 1                | 0.94           | 5    | 26%   | 21   | 158  |                           |  |
| El Portal_S       | 56   | 1.04     | 7          | 0.99           | 14   | 20%   | 73   | 382 | 1279                      | 1.05     | 7                | 0.96           | 23   | 31%   | 73   | 651  |                           |  |
| Forks of S._S     | 32   | 0.83     | 7          | 0.99           | 61   | 22%   | 273  | 816 | 1199                      | 0.82     | 11               | 0.97           | 61   | 32%   | 191  | 1504 |                           |  |
| Happy Camp_S      | 14   | 0.98     | 13         | 0.98           | 13   | 14%   | 87   | 157 | 348                       | 0.98     | 13               | 0.97           | 16   | 18%   | 86   | 295  |                           |  |
| Hoopa_S           | 64   | 0.86     | 10         | 0.99           | 29   | 32%   | 90   | 887 | 1632                      | 0.84     | 10               | 0.96           | 39   | 49%   | 80   | 1502 |                           |  |
| Keeler_S          | 78   | 1.04     | 0          | 0.99           | 4    | 14%   | 26   | 115 | 1876                      | 1.00     | 1                | 0.95           | 8    | 29%   | 27   | 260  |                           |  |
| Missoula_S        | 46   | 1.38     | -2         | 0.97           | 2    | 24%   | 8    | 20  | 1152                      | 1.11     | 0                | 0.76           | 4    | 48%   | 8    | 57   |                           |  |
| Oakley_S          | 1    | --       | --         | --             | --   | --    | --   | --  | 48                        | 0.85     | 3                | 0.97           | 11   | 40%   | 27   | 236  |                           |  |
| Oakridge_S        | 77   | 1.13     | -2         | 0.99           | 14   | 40%   | 35   | 489 | 1865                      | 1.15     | -2               | 0.98           | 20   | 55%   | 36   | 717  |                           |  |
| Oroville_S        | 40   | 1.16     | -5         | 1.00           | 34   | 31%   | 111  | 852 | 1016                      | 1.19     | -7               | 0.99           | 49   | 48%   | 103  | 1506 |                           |  |
| Pinehurst_S       | 6    | 0.95     | 5          | 0.61           | 5    | 35%   | 13   | 17  | 157                       | 0.85     | 7                | 0.54           | 7    | 53%   | 13   | 43   |                           |  |
| RTP_S             | 17   | 0.81     | 2          | 0.88           | 2    | 25%   | 7    | 13  | 429                       | 0.93     | 2                | 0.88           | 2    | 31%   | 7    | 40   |                           |  |
| Tulelake_S        | 78   | 1.02     | 3          | 0.98           | 6    | 27%   | 23   | 213 | 1720                      | 0.98     | 4                | 0.95           | 10   | 45%   | 23   | 422  |                           |  |
| All smoke         | 729  | 0.95     | 3          | 0.97           | 20   | 41%   | 50   | 887 | 18082                     | 0.99     | 0                | 0.95           | 27   | 55%   | 49   | 1506 |                           |  |
| ALL               | 4964 | 0.95     | 0          | 0.97           | 7    | 54%   | 14   | 887 | 126148                    | 1        | 0                | 0.96           | 10   | 73%   | 14   | 1506 |                           |  |

## 7 Additional analysis on missing RH

A brief analysis was done to understand how the performance would change for sites without RH. Overall, the agreement by AQI category is similar (within 3%) whether the RH measurements or an assumed default of 50% RH is used, however, using the RH does allow the correct AQI category to be more often predicted (94% of the time with RH, 93% of the time without).

Table S 15. Percent of PurpleAir NowCast AQI categories in agreement with monitor NowCast. Compares the final corrected PurpleAir data with the transition to assuming relative humidity levels of 0, 50, and 100%. Green shaded cells indicate better performance (a larger percentage of NowCast averages correctly reported) than the final correction while grey shaded cells perform worse than the final correction with the transition.

| Reference AQI category | Category difference | Count in category (N) | Final correction (%) | Final correction assume 50% RH (%) | Final correction assume 0% RH (%) | Final correction assume 100% RH (%) |
|------------------------|---------------------|-----------------------|----------------------|------------------------------------|-----------------------------------|-------------------------------------|
| Good                   | 0                   | 136612                | 98                   | 97                                 | 85                                | 100                                 |
| Good                   | 1                   |                       | 2                    | 3                                  | 15                                | 0                                   |
| Good                   | 2                   |                       | 0                    | 0                                  | 0                                 | 0                                   |
| Moderate               | 0                   | 21363                 | 71                   | 71                                 | 87                                | 45                                  |
| Moderate               | -1                  |                       | 25                   | 26                                 | 6                                 | 54                                  |
| Moderate               | 1                   |                       | 4                    | 3                                  | 7                                 | 1                                   |
| Moderate               | 2                   |                       | 0                    | 0                                  | 0                                 | 0                                   |
| UHSB                   | 0                   | 1803                  | 66                   | 69                                 | 63                                | 63                                  |
| UHSB                   | -1                  |                       | 8                    | 11                                 | 4                                 | 25                                  |
| UHSB                   | 1                   |                       | 25                   | 21                                 | 33                                | 12                                  |
| UHSB                   | -2                  |                       | 0                    | 0                                  | 0                                 | 0                                   |
| Unhealthy              | 0                   | 1982                  | 94                   | 93                                 | 93                                | 89                                  |
| Unhealthy              | -1                  |                       | 3                    | 4                                  | 3                                 | 8                                   |
| Unhealthy              | 1                   |                       | 3                    | 3                                  | 5                                 | 2                                   |
| Unhealthy              | -2                  |                       | 0                    | 0                                  | 0                                 | 1                                   |
| Very Unhealthy         | 0                   | 615                   | 89                   | 88                                 | 89                                | 87                                  |
| Very Unhealthy         | -1                  |                       | 7                    | 7                                  | 5                                 | 10                                  |
| Very Unhealthy         | 1                   |                       | 5                    | 4                                  | 6                                 | 3                                   |
| Hazardous              | 0                   | 969                   | 88                   | 88                                 | 89                                | 86                                  |
| Hazardous              | -1                  |                       | 12                   | 12                                 | 11                                | 14                                  |
| All Categories         | 0                   | 163344                | 94                   | 93                                 | 85                                | 92                                  |
| All Categories         | -1                  |                       | 4                    | 4                                  | 1                                 | 8                                   |
| All Categories         | 1                   |                       | 3                    | 3                                  | 14                                | 1                                   |
| All Categories         | -2                  |                       | 0                    | 0                                  | 0                                 | 0                                   |
| All Categories         | 2                   |                       | 0                    | 0                                  | 0                                 | 0                                   |
